# Supplementary material for: Spectrum and Density of Gamma and X-ray Induced Mutations in a Non-Model Rice Cultivar
Source: Plants (Basel). 2022 Nov 25;11(23):3232. doi: 10.3390/plants11233232 (PMC9741009; doi:10.3390/plants11233232)
Supplement: Supplementary file 1 [file plants-11-03232-s001.zip › plants-2024997-supplementary.pdf]

## Supplemental Figures

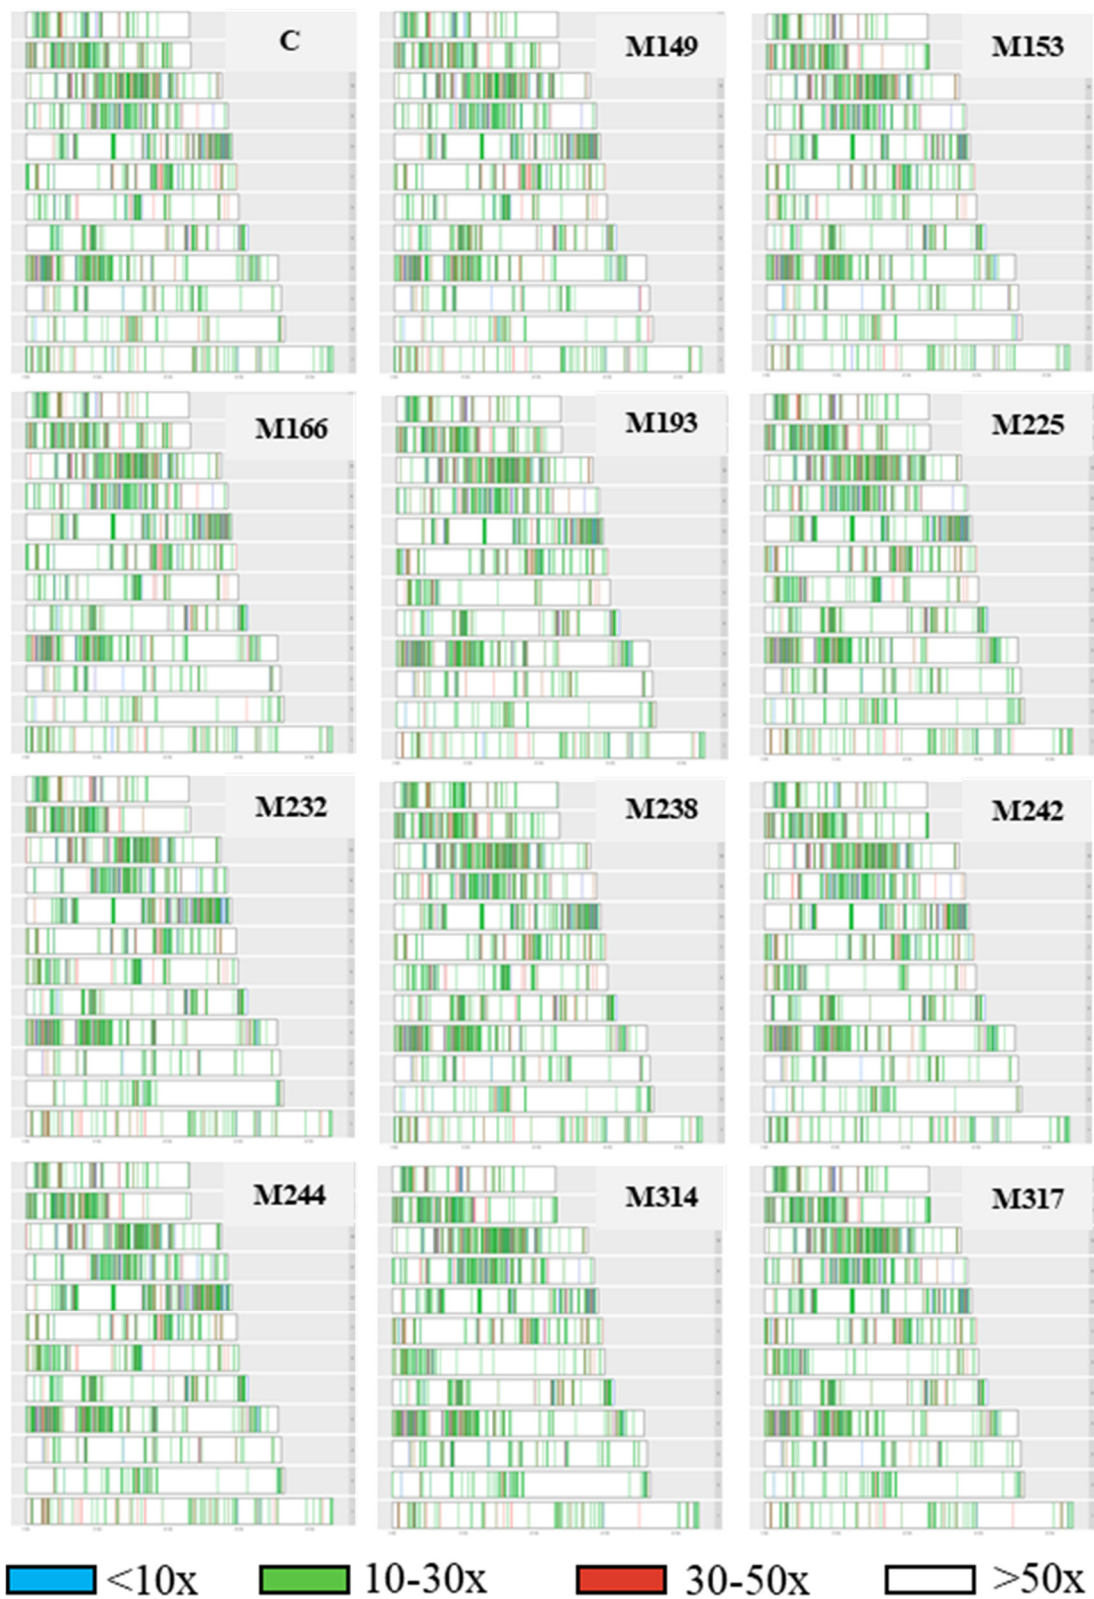

**Supplemental Figure S1.** Sequencing coverage per chromosome. Coverage of <10x is blue, 10-30x green, 30-50x red and >50x white.

**Gamma treatment**

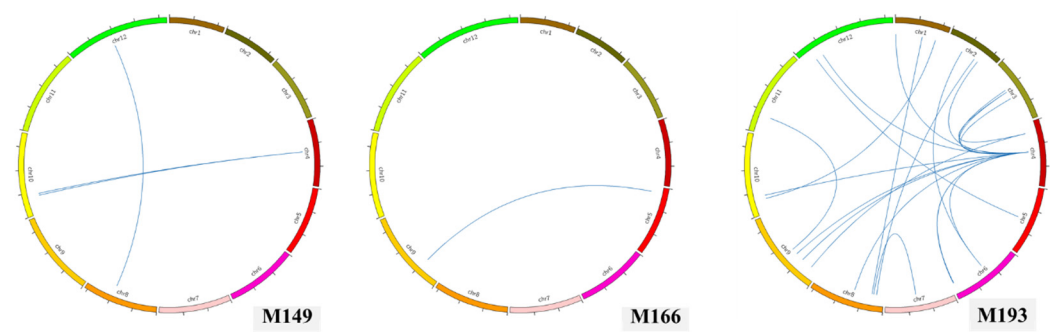

**X-ray treatment**

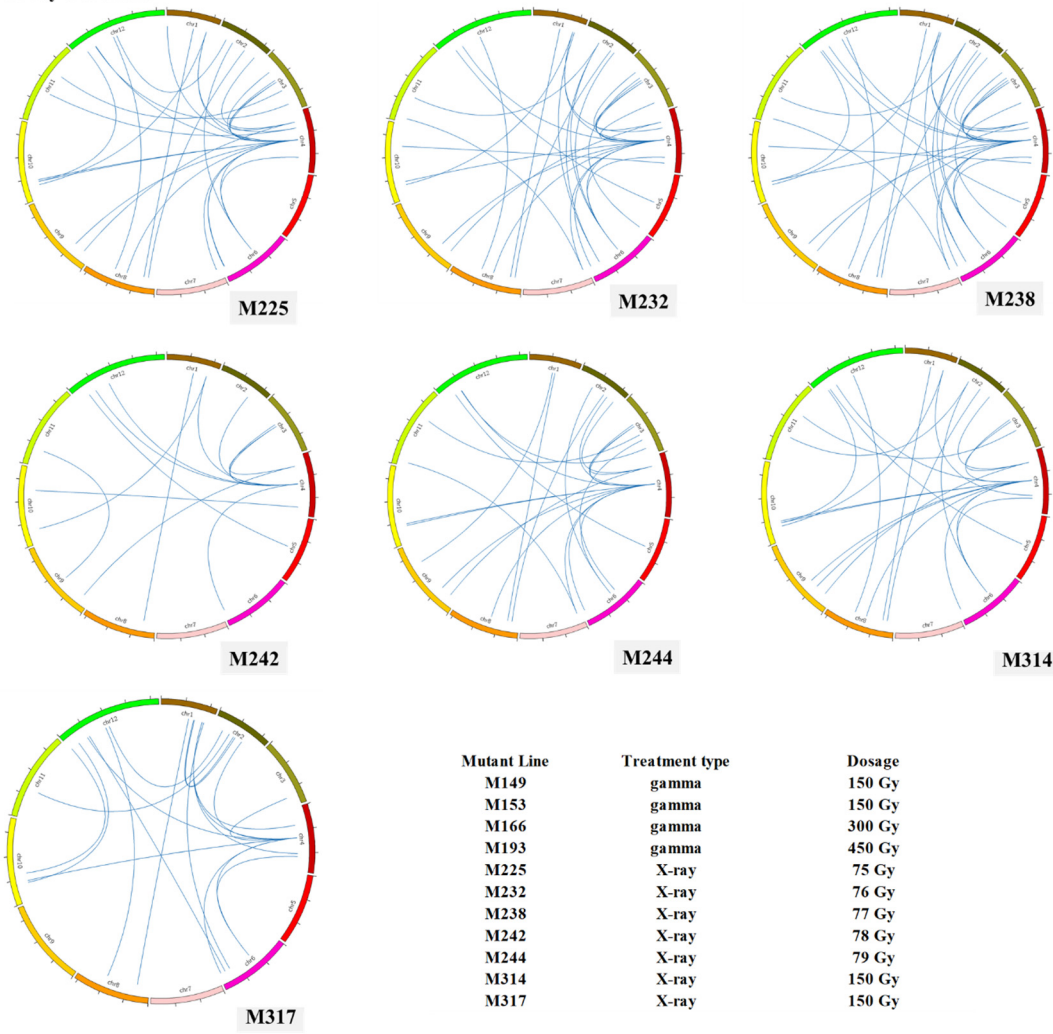

| Mutant Line | Treatment type | Dosage |
|-------------|----------------|--------|
| M149        | gamma          | 150 Gy |
| M153        | gamma          | 150 Gy |
| M166        | gamma          | 300 Gy |
| M193        | gamma          | 450 Gy |
| M225        | X-ray          | 75 Gy  |
| M232        | X-ray          | 76 Gy  |
| M238        | X-ray          | 77 Gy  |
| M242        | X-ray          | 78 Gy  |
| M244        | X-ray          | 79 Gy  |
| M314        | X-ray          | 150 Gy |
| M317        | X-ray          | 150 Gy |

**Supplemental Figure S2.** Cross-chromosomal translocations detected in each sample. Data from the two replicates were merged together and translocations identified in the control material were removed.

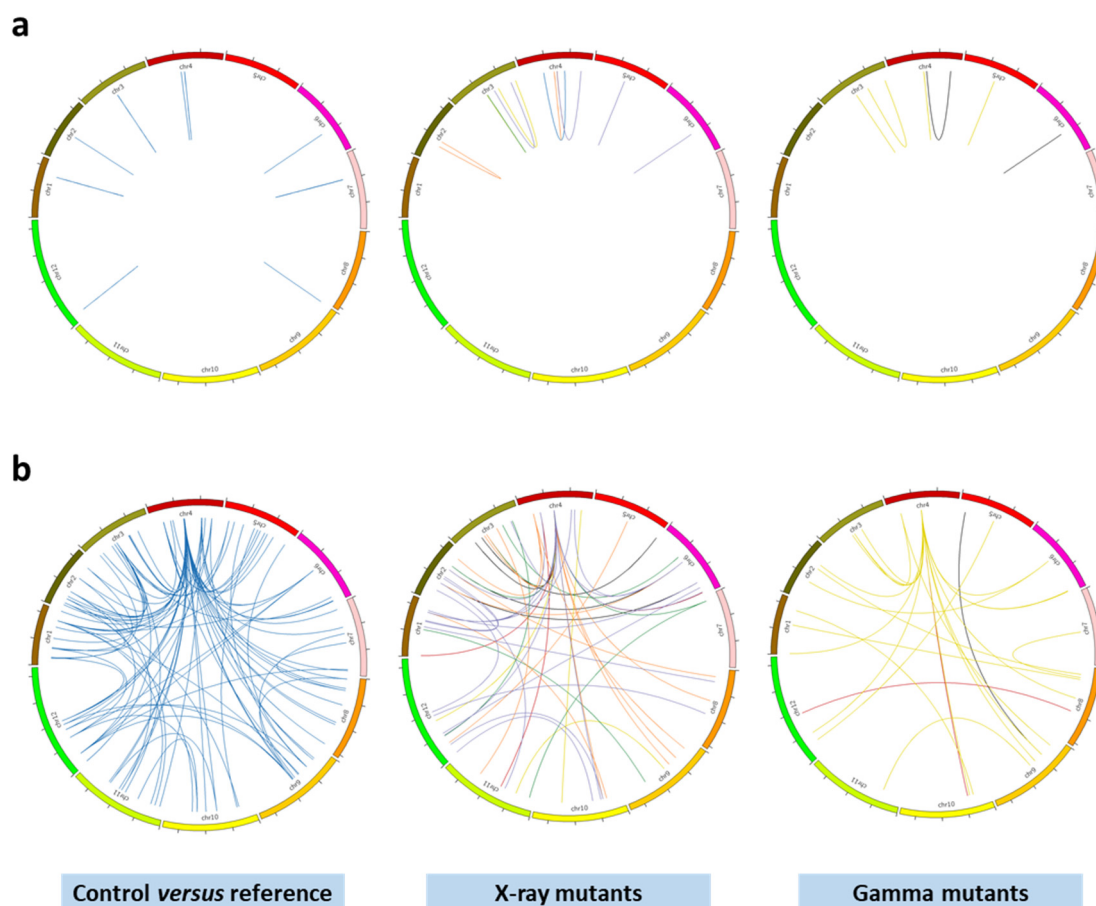

**Supplemental Figure S3.** Summary of translocations in all mutants. (a) Intrachromosomal translocations identified between control and the reference genome and irradiated material. (b) Cross-chromosomal translocations identified between control and the reference genome and irradiated material. Translocations identified in control material were removed from plots of X-ray and gamma mutants to show only events potentially caused by irradiation.

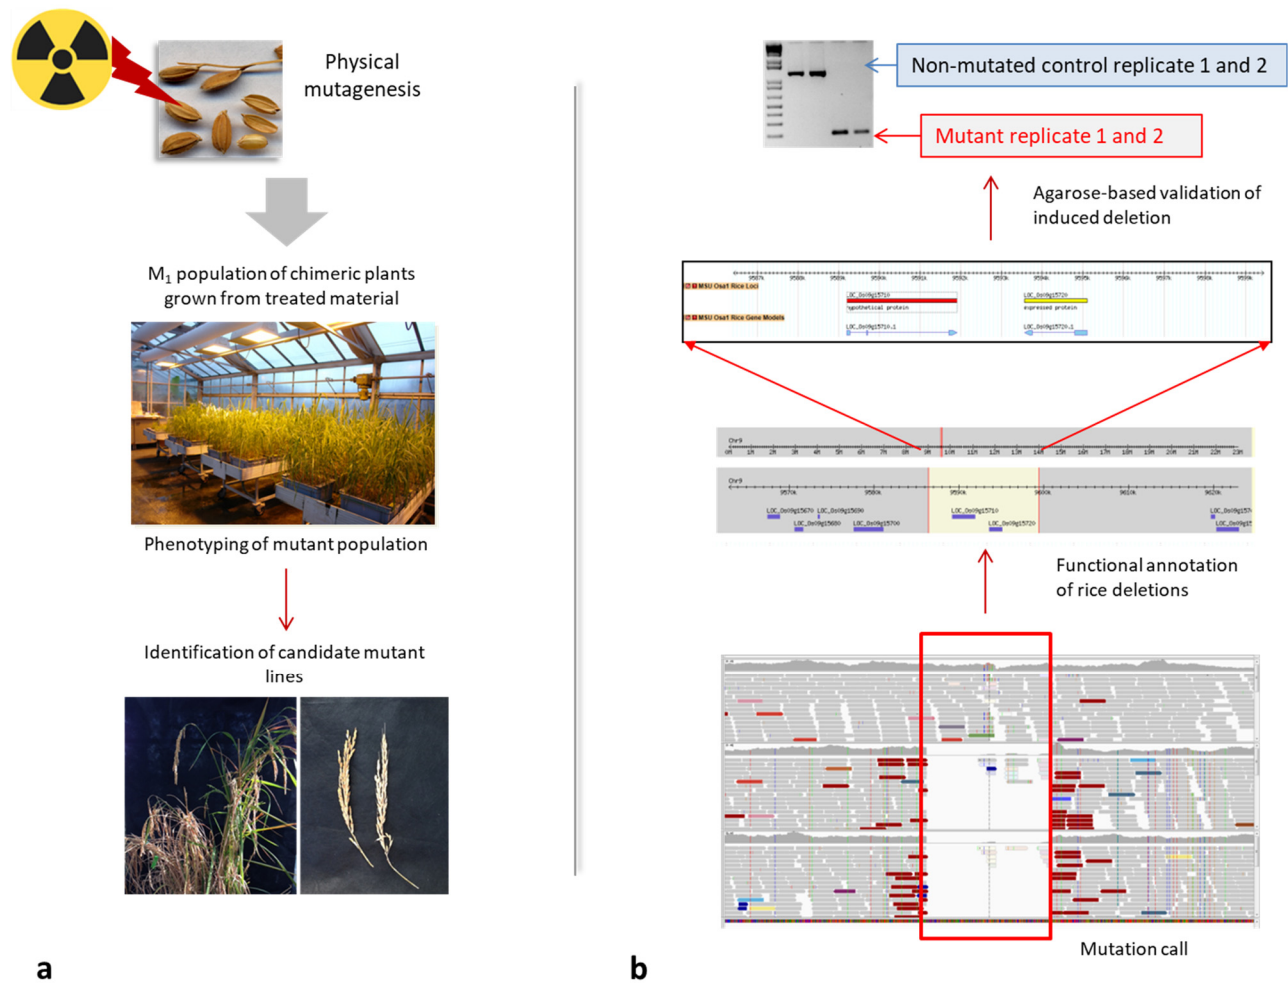

**Supplemental Figure S4.** Generation of a mutant population and selection of candidate mutant lines. a) X-ray 75 Gy mutant line M242 is being displayed which is characterized by dwarf growth, early maturing, short and dark-brown grain. b) Upon whole genome sequencing, mutations were called, functionally annotated and confirmed *via* Sanger sequencing or gel assay in both biological replicates.
