# Supplementary material for: Spectrum and Density of Gamma and X-ray Induced Mutations in a Non-Model Rice Cultivar
Source: Plants (Basel). 2022 Nov 25;11(23):3232. doi: 10.3390/plants11233232 (PMC9741009; doi:10.3390/plants11233232)
Supplement: Supplementary file 1 [file plants-11-03232-s001.zip › Tables S1-S4.xls]

## Sheet: Supplemental Table S1
Supplemental Table S1. Summary of alignment statistics
Sample	Total number of reads	Percentage aligned	Percentage aligned in pairs	Duplication rate
43801control	147211292	0.986	0.997	0.398
43802control	144544874	0.986	0.996	0.406
M149_1	140631472	0.987	0.997	0.384
M149_2	142027050	0.987	0.996	0.368
M153_1	134871192	0.988	0.997	0.39
M153_2	134592246	0.987	0.997	0.394
M166_1	142380234	0.986	0.996	0.424
M166_2	130858570	0.986	0.996	0.395
M193_1	180821848	0.987	0.997	0.383
M193_2	182922162	0.988	0.997	0.417
M225_1	145104010	0.987	0.996	0.341
M225_2	151692580	0.987	0.996	0.345
M232_1	173875672	0.988	0.996	0.452
M232_2	160306672	0.986	0.996	0.415
M238_1	174489558	0.986	0.996	0.439
M238_2	144897320	0.987	0.996	0.385
M242_1	135425738	0.989	0.997	0.343
M242_2	137742102	0.987	0.997	0.326
M244_1	125509494	0.989	0.997	0.357
M244_2	162360042	0.99	0.997	0.462
M314_1	143014276	0.988	0.997	0.354
M314_2	134391652	0.988	0.996	0.362
M317_1	129773554	0.987	0.996	0.361
M317_2	147160400	0.988	0.997	0.391

## Sheet: Supplemental Table S2
Supplemental Table S2. Mean coverage per sample
Sample	Mean Coverage
43801control	29.6457
43802control	28.7599
M149_1	28.8901
M149_2	29.9451
M153_1	27.4489
M153_2	27.2143
M166_1	27.4301
M166_2	26.4142
M193_1	36.9927
M193_2	35.5669
M225_1	31.9893
M225_2	33.1557
M232_1	31.7131
M232_2	31.3321
M238_1	32.5041
M238_2	29.797
M242_1	29.6822
M242_2	30.8979
M244_1	26.9718
M244_2	29.1983
M314_1	30.8907
M314_2	28.7438
M317_1	27.7059
M317_2	30.0737

## Sheet: Supplemental Table S3
Supplemental Table S3. Summary of filtering natural point mutations and small indels
Sample	Replicate	Matching Control & Removed	Common Variants in Lines & Removed	Variants not in Replicate & Removed
43803	43804	1695254	123461	16745
43804	43803	1692186	124574	16285
43805	43806	1412472	261654	11634
43806	43805	1389964	254026	11396
43807	43808	1606512	150598	13983
43808	43807	1584222	146686	14956
43809	43810	1501587	296752	13774
43810	43809	1495148	292387	12712
43811	43812	1484494	261997	12193
43812	43811	1484283	264988	13261
43813	43814	1268327	419013	16659
43814	43813	1251269	412540	15898
43815	43816	1561234	203025	13900
43816	43815	1556051	211670	12617
43818	43819	1425444	271046	22681
43819	43818	1433665	268368	25150
43820	43821	1233379	406599	15906
43821	43820	1245335	413421	16391
43822	43823	1300630	357798	12225
43823	43822	1286502	353419	12955
43824	43825	1271221	347509	13207
43825	43824	1290765	355685	12381

## Sheet: Supplemental Table S4
Supplemental Table S4. Deletion events called in mutant line M149
Mutation Call	Call Size (bp)	Transposon/retrotransposon	Locus affected	Function
Chr1:715338…716796	1458		intergenic
Chr1:749788…763629	13841		LOC_Os01g02370.1	receptor-like kinase ARK1AS, putative, expressed
		+	LOC_Os01g02380.1	retrotransposon protein, putative, Ty3-gypsy subclass, expressed
Chr1:939752…953845	14093	+	LOC_Os01g02740.1	retrotransposon protein, putative, unclassified, expressed
Chr1:1579867…1594615	14748		LOC_Os01g03770.1	hypothetical protein
		+	LOC_Os01g03780.1	retrotransposon protein, putative, unclassified, expressed
		+	LOC_Os01g03790.1	retrotransposon protein, putative, unclassified
		+	LOC_Os01g03800.1	transposon protein, putative, Mutator sub-class, expressed
Chr1:1646772…1647808	1036	+	LOC_Os01g03880.1	retrotransposon protein, putative, Ty3-gypsy subclass
Chr1:1969221…1970774	1553		LOC_Os01g04430.1	expressed protein
				Plant Model Organism Orthologous Group - APK_ORTHOMCL16552: receptor serine/threonine kinase PR5K (orthologous gene from Brachypodium)
Chr1:1973026…1973644	618		intergenic
Chr1:2004186…2005558	1372		intergenic
Chr1:2007765…2014480	6715		intergenic
Chr1:2298684…2306373	7689	+	LOC_Os01g04960.1;	transposon protein, putative, unclassified, expressed
Chr1:2415498…2416037	539		intergenic
Chr1:2593133…2593373	240		LOC_Os01g05490.1	triosephosphate isomerase, cytosolic, putative, expressed
			LOC_Os01g05490.2	alt splice form LOC_Os01g05490.2
Chr1:12586477…37768529	25182052
Chr1:41752711…41757629	4918	+	LOC_Os01g72030.1	retrotransposon protein, putative, unclassified, expressed
Chr1:42934067…42941561	7494	+	LOC_Os01g74130.1	retrotransposon protein, putative, unclassified
Chr1:43256449…43269330	12881	+	LOC_Os01g74680.1	retrotransposon protein, putative, unclassified, expressed
		+	LOC_Os01g74690.1	retrotransposon protein, putative, unclassified, expressed
Chr2:214437…214871	434		intergenic
Chr2:2376053…2377635	1582		intergenic
Chr2:3000331…3006995	6664		LOC_Os02g06030.1	phytosulfokine receptor precursor, putative, expressed
Chr2:3009069…3021966	12897	+	LOC_Os02g06040.1	retrotransposon protein, putative, unclassified, expressed
		+	LOC_Os02g06050.1	transposon protein, putative, unclassified, expressed
Chr2:6926452…6929868	3416		intergenic
Chr2:6937722…6938561	839		intergenic
Chr2:6968906…6969564	658		LOC_Os02g13110.2	serine/threonine protein phosphatase 2A 55 kDa regulatory subunit B, putative, expressed
			LOC_Os02g13110.1	alt splice form LOC_Os02g13110.1
Chr2:6974636…6975384	748		intergenic
Chr2:6975617…6977134	1517		LOC_Os02g13120.1	expressed protein
Chr2:7000166…7001316	1150		intergenic
Chr2:7017434…7018475	1041		LOC_Os02g13170.1	mitochondrial carrier protein, putative, expressed
Chr2:7667843…8382683	714840
Chr2:8189732…8190463	731		intergenic
Chr2:8214770…8217618	2848		LOC_Os02g14800.2	expressed protein
Chr2:8468450…8469854	1404		intergenic
Chr2:8564954…8575993	11039	+	LOC_Os02g15320.1	transposon protein, putative, CACTA, En/Spm sub-class, expressed
		+	LOC_Os02g15330.1;	transposon protein, putative, CACTA, En/Spm sub-class, expressed
Chr2:26726465…26727386	921		LOC_Os02g44155.1	expressed protein
Chr2:27127995…27128444	449		intergenic
Chr2:34397788…34400249	2461		intergenic
Chr2:34437315…34437924	609		intergenic
Chr2:34453088…34457773	4685		LOC_Os02g56290.1	expressed protein
Chr2:34517910…34519647	1737		LOC_Os02g56380.1	OsWAK21 - OsWAK receptor-like cytoplasmic kinase OsWAK-RLCK, expressed
Chr2:34566631…34570008	3377		intergenic
Chr2:34745954…34753957	8003		intergenic
Chr2:34826922…34832397	5475	+	LOC_Os02g56830.1	transposon protein, putative, CACTA, En/Spm sub-class, expressed
Chr2:35063606…35067008	3402	+	LOC_Os02g57230.1	retrotransposon protein, putative, unclassified, expressed
Chr3:1898252…1902843	4591	+	LOC_Os03g04150.1	transposon protein, putative, Mutator sub-class, expressed
Chr3:2748762…10230191	7481429
Chr3:3912825…3936785	23960		LOC_Os03g07710.1	hypothetical protein
			LOC_Os03g07720.1	expressed protein
			LOC_Os03g07730.1	expressed protein
			LOC_Os03g07739.2	expressed protein
Chr3:4292550…4302675	10125	+	LOC_Os03g08400.1	retrotransposon protein, putative, unclassified, expressed
Chr3:5369867…5384310	14443		LOC_Os03g10540.1	OsFBX78 - F-box domain containing protein, expressed
			LOC_Os03g10550.1	expressed protein
Chr3:5501406…5501966	560		intergenic
Chr3:8334219…8335040	821		intergenic
Chr3:10420107…10420460	353		intergenic
Chr3:10664572…10664572	0	+	LOC_Os03g19050.1	transposon protein, putative, unclassified, expressed
Chr3:11042891…11043314	423		intergenic
Chr3:11161907...11162915	1008		LOC_Os03g19840.1	cysteine-rich repeat secretory protein 55 precursor, putative, expressed
Chr3:13595032…13596266	1234		intergenic
Chr3:13801380…13807644	6264	+	LOC_Os03g24260.1	retrotransposon protein, putative, unclassified, expressed
Chr3:13814982…13827865	12883	+	LOC_Os03g24270.1	transposon protein, putative, unclassified, expressed
		+	LOC_Os03g24280.1	transposon protein, putative, unclassified, expressed
Chr3:14438553…14439508	955		LOC_Os03g25289.1	auxin responsive protein, putative, expressed
Chr3:14592819…14593658	839		intergenic
Chr3:14671926…14672361	435		LOC_Os03g25620.1	LTV1, putative, expressed
Chr3:14730292…14735489	5197		LOC_Os03g25750.1	SNARE associated Golgi protein, putative, expressed
Chr3:14972622…14976609	3987		intergenic
Chr3:15081378…15092679	11301	+	LOC_Os03g26390.1	retrotransposon protein, putative, Ty3-gypsy subclass, expressed
		+	LOC_Os03g26400.1	retrotransposon protein, putative, Ty3-gypsy subclass
Chr3:16001593…16011936	10343	+	LOC_Os03g27860.1	transposon protein, putative, CACTA, En/Spm sub-class, expressed
		+	LOC_Os03g27870.1	transposon protein, putative, CACTA, En/Spm sub-class, expressed
Chr3:17575718…17576146	428		LOC_Os03g30840.1	expressed protein
Chr3:21360122…21360547	425		LOC_Os03g38480.1	expressed protein
Chr3:27181302…27191157	9855	+	LOC_Os03g47840.1	retrotransposon protein, putative, unclassified, expressed
Chr3:34247223…34253653	6430	+	LOC_Os03g60230.1	retrotransposon protein, putative, Ty1-copia subclass, expressed
Chr3:34303046…34303733	687		intergenic
Chr3:34863501…34867752	4251	+	LOC_Os03g61450.1	transposon protein, putative, unclassified, expressed
			LOC_Os03g61460.1	hypothetical protein
Chr3:34947488…34952489	5001	+	LOC_Os03g61660.1	retrotransposon protein, putative, unclassified, expressed
			LOC_Os03g61670.1	calreticulin precursor, putative, expressed
Chr3:34990754…34991850	1096		intergenic
Chr3:35584198…35584787	589		LOC_Os03g62900.1	OsDegp4 - Putative Deg protease homologue, expressed
Chr3:35639578…35645215	5637	+	LOC_Os03g63030.1	transposon protein, putative, unclassified, expressed
Chr3:35763652…35764793	1141		intergenic
Chr3:35942421…35944561	2140		intergenic
Chr3:35962456…35962802	346		intergenic
Chr4:392447…395807	3360		intergenic
Chr4:616636…617148	512		intergenic
Chr4:848570…856256	7686	+	LOC_Os04g02370.1	transposon protein, putative, unclassified, expressed
			LOC_Os04g02375.1	expressed protein
			LOC_Os04g02380.1	hypothetical protein
Chr4:868896…869497	601		intergenic
Chr4:1027263…1027864	601		intergenic
Chr4:1166793…1170196	3403		intergenic
Chr4:1191467…1197909	6442		LOC_Os04g02960.1	OsSub32 - Putative Subtilisin homologue, expressed
Chr4:1747319…1750562	3243		intergenic
Chr4:2052836…2053353	517		intergenic
Chr4:4212541…4213002	461		intergenic
Chr4:7380005…7383190	3185		intergenic
Chr4:7523572…7528196	4624		intergenic
Chr4:8055765…8059026	3261		intergenic
Chr4:8395112…8412808	17696	+	LOC_Os04g14930.1	retrotransposon protein, putative, Ty1-copia subclass
		+	LOC_Os04g14940.1	retrotransposon protein, putative, unclassified, expressed
		+	LOC_Os04g14950.1	retrotransposon protein, putative, unclassified, expressed
		+	LOC_Os04g14960.1	retrotransposon protein, putative, Ty1-copia subclass, expressed
		+	LOC_Os04g14970.1	retrotransposon protein, putative, Ty1-copia subclass, expressed
Chr4:8422405…8423704	1299		LOC_Os04g14990.1	BURP domain containing protein, expressed
Chr4:8574543…8577596	3053		intergenic
Chr4:8957800…8980731	22931	+	LOC_Os04g16480.1	transposon protein, putative, unclassified
		+	LOC_Os04g16490.1	retrotransposon protein, putative, Ty3-gypsy subclass, expressed
		+	LOC_Os04g16500.1	retrotransposon protein, putative, Ty3-gypsy subclass
		+	LOC_Os04g16510.1	retrotransposon protein, putative, Ty3-gypsy subclass, expressed
		+	LOC_Os04g16520.1	retrotransposon protein, putative, unclassified
Chr4:8992359…9003679	11320	+	LOC_Os04g16540.1	retrotransposon protein, putative, Ty3-gypsy subclass
		+	LOC_Os04g16550.1	retrotransposon protein, putative, Ty3-gypsy subclass, expressed
Chr4:9641969…9646361	4392	+	LOC_Os04g17620.1	retrotransposon protein, putative, unclassified, expressed
Chr4:9720294…9740045	19751	+	LOC_Os04g17740.1	transposon protein, putative, unclassified, expressed
		+	LOC_Os04g17750.1	retrotransposon protein, putative, unclassified, expressed
		+	LOC_Os04g17760.1	retrotransposon protein, putative, unclassified, expressed
		+	LOC_Os04g17770.1	transposon protein, putative, unclassified, expressed
Chr4:11727490…11735587	8097	+	LOC_Os04g20900.1	retrotransposon protein, putative, unclassified
Chr4:11841154…11844299	3145	+	LOC_Os04g21060.1	retrotransposon protein, putative, unclassified, expressed
		+	LOC_Os04g21070.1	retrotransposon protein, putative, unclassified
Chr4:13296069…13307397	11328	+	LOC_Os04g23300.1	retrotransposon protein, putative, Ty3-gypsy subclass, expressed
		+	LOC_Os04g23310.1	retrotransposon protein, putative, Ty3-gypsy subclass, expressed
Chr4:14224044…14228640	4596		LOC_Os04g24770.1	expressed protein
Chr4:16194925…16196291	1366		intergenic
Chr4:16232582…16233305	723		intergenic
Chr4:16386571…16390487	3916	+	LOC_Os04g27730.1	retrotransposon protein, putative, unclassified, expressed
Chr4:16556899…16557396	497		LOC_Os04g28040.1	expressed protein
Chr4:17793228…17796783	3555	+	LOC_Os04g29850.1	retrotransposon protein, putative, Ty3-gypsy subclass
Chr4:21013730…22880497	1866767
Chr4:21501398…21506100	4702		intergenic
Chr4:21858331…21863990	5659	+	LOC_Os04g35870.1	retrotransposon protein, putative, unclassified, expressed
Chr4:22516764…22528486	11722	+	LOC_Os04g37850.1	transposon protein, putative, CACTA, En/Spm sub-class, expressed
			LOC_Os04g37860.1	variant latency associated nuclear antigen, putative, expressed
		+	LOC_Os04g37870.1	transposon protein, putative, CACTA, En/Spm sub-class, expressed
Chr4:29687973…29699288	11315	+	LOC_Os04g49800.1	retrotransposon protein, putative, Ty3-gypsy subclass, expressed
		+	LOC_Os04g49810.1	retrotransposon protein, putative, Ty3-gypsy subclass
Chr4:30305945…30307142	1197		intergenic
Chr4:30364434…30365519	1085		intergenic
Chr4:30477205…30478424	1219		LOC_Os04g51454.1	expressed protein
Chr4:30486270…30495212	8942	+	LOC_Os04g51470.1	transposon protein, putative, unclassified, expressed
Chr4:30673365…30674446	1081		LOC_Os04g51760.1	expressed protein
Chr4:31813503…31815775	2272		LOC_Os04g53420.1	expressed protein
Chr4:32466826…32470728	3902		intergenic
Chr4:33021868…33022297	429		intergenic
Chr4:33613530…33621585	8055	+	LOC_Os04g56380.1	transposon protein, putative, unclassified, expressed
Chr4:34007638…34013665	6027	+	LOC_Os04g57060.1	retrotransposon protein, putative, unclassified, expressed
Chr5:405044…408728	3684		LOC_Os05g01675.1	photosystem I P700 chlorophyll a apoprotein A1, putative, expressed
Chr5:639975…640844	869		LOC_Os05g02130.1	ankyrin repeat domain-containing protein 28, putative, expressed
Chr5:1764617…1765659	1042		intergenic
Chr5:1779923…1781015	1092		intergenic
Chr5:2982136…2983578	1442		LOC_Os05g05960.1	expressed protein
Chr5:3992796…4026341	33545	+	LOC_Os05g07480.1	retrotransposon protein, putative, unclassified
		+	LOC_Os05g07490.1	retrotransposon protein, putative, unclassified
		+	LOC_Os05g07500.1	retrotransposon protein, putative, Ty3-gypsy subclass, expressed
		+	LOC_Os05g07520.1	retrotransposon protein, putative, Ty3-gypsy subclass, expressed
Chr5:5314226…5314764	538		intergenic
Chr5:5622274…5646058	23784		intergenic
Chr5:5660957…5671827	10870	+	LOC_Os05g10390.1	transposon protein, putative, CACTA, En/Spm sub-class, expressed
		+	LOC_Os05g10400.1	transposon protein, putative, CACTA, En/Spm sub-class, expressed
Chr5:6197837…6203228	5391		LOC_Os05g11064.1	expressed protein
Chr5:9352289…9353385	1096	+	LOC_Os05g16470.1	retrotransposon protein, putative, unclassified, expressed
		+	LOC_Os05g16480.1	retrotransposon protein, putative, unclassified, expressed
Chr5:14116904…14129773	12869	+	LOC_Os05g24460.1	retrotransposon protein, putative, unclassified, expressed
		+	LOC_Os05g24470.1	retrotransposon protein, putative, unclassified, expressed
Chr5:14255464…14258822	3358		intergenic
Chr5:14933114…14933891	777		intergenic
Chr5:14992060…14992559	499		LOC_Os05g25770.1	WRKY45, expressed
Chr5:15254628…15265158	10530	+	LOC_Os05g26220.1	retrotransposon protein, putative, Ty3-gypsy subclass, expressed
		+	LOC_Os05g26230.1	retrotransposon protein, putative, Ty3-gypsy subclass, expressed
Chr5:15711141…15722122	10981	+	LOC_Os05g27020.1	transposon protein, putative, CACTA, En/Spm sub-class, expressed
		+	LOC_Os05g27034.1	transposon protein, putative, CACTA, En/Spm sub-class, expressed
Chr5:15844412…15863727	19315	+	LOC_Os05g27250.1	retrotransposon protein, putative, unclassified, expressed
		+	LOC_Os05g27260.1	retrotransposon protein, putative, unclassified
		+	LOC_Os05g27270.1	retrotransposon protein, putative, unclassified, expressed
		+	LOC_Os05g27280.1	retrotransposon protein, putative, unclassified, expressed
		+	LOC_Os05g27290.1	retrotransposon, putative, centromere-specific
Chr5:16248402…16249207	805		intergenic
Chr5:17205942…17206894	952		intergenic
Chr5:17846475…17848334	1859		intergenic
Chr5:17959626…17960189	563		intergenic
Chr5:19447808…19448762	954		intergenic
Chr5:19476366…19477071	705		intergenic
Chr5:19666480…19677857	11377	+	LOC_Os05g33480.1	retrotransposon protein, putative, unclassified, expressed
		+	LOC_Os05g33490.1	retrotransposon protein, putative, Ty3-gypsy subclass, expressed
Chr5:20214040…20222420	8380	+	LOC_Os05g34190.1	retrotransposon protein, putative, unclassified
Chr5:25591414…25606047	14633	+	LOC_Os05g43990.1	retrotransposon protein, putative, Ty3-gypsy subclass, expressed
		+	LOC_Os05g44000.1	retrotransposon protein, putative, Ty3-gypsy subclass
		+	LOC_Os05g44010.1	retrotransposon protein, putative, Ty3-gypsy subclass
Chr5:27052482…27055715	3233		intergenic
Chr5:27331634…27343595	11961	+	LOC_Os05g47710.1	transposon protein, putative, unclassified, expressed
		+	LOC_Os05g47720.1	transposon protein, putative, unclassified, expressed
Chr5:27732603...27733094	491		intergenic
Chr5:27811071…27821129	10058	+	LOC_Os05g48530.1	transposon protein, putative, CACTA, En/Spm sub-class, expressed
			LOC_Os05g48540.1	expressed protein
		+	LOC_Os05g48550.1	transposon protein, putative, CACTA, En/Spm sub-class, expressed
Chr5:27920909…27927277	6368		LOC_Os05g48710.1	expressed protein
		+	LOC_Os05g48720.1	transposon protein, putative, Mariner sub-class, expressed
Chr5:27962333…27963412	1079		LOC_Os05g48790.1	expressed protein
Chr5:28138721…28139721	1000	+	LOC_Os05g49090.1	retrotransposon protein, putative, Ty3-gypsy subclass
Chr5:28424259…28440133	15874	+	LOC_Os05g49560.1	retrotransposon protein, putative, unclassified, expressed
		+	LOC_Os05g49570.1	retrotransposon protein, putative, unclassified, expressed
Chr5:29390951…29402046	11095	+	LOC_Os05g51250.1	transposon protein, putative, CACTA, En/Spm sub-class, expressed
		+	LOC_Os05g51260.1	transposon protein, putative, CACTA, En/Spm sub-class, expressed
Chr5:29682509…29685124	2615		intergenic
Chr6:3293248…3294699	1451		LOC_Os06g06940.1	S-locus-like receptor protein kinase, putative, expressed
Chr6:29899553…29905069	5516	+	LOC_Os06g49350.1	retrotransposon protein, putative, unclassified, expressed
Chr6:30423515…30434824	11309	+	LOC_Os06g50260.1	retrotransposon protein, putative, Ty3-gypsy subclass, expressed
		+	LOC_Os06g50270.1	retrotransposon protein, putative, Ty3-gypsy subclass, expressed
Chr6:30871106…30874970	3864		LOC_Os06g51029.1	OsFtsH1 FtsH protease, homologue of AtFtsH1/5, expressed
Chr7:24205…35398	11193	+	LOC_Os07g01040.1	retrotransposon protein, putative, unclassified, expressed
		+	LOC_Os07g01050.1	retrotransposon protein, putative, unclassified
Chr7:42391…44131	1740		LOC_Os07g01070.1	peptide transporter, putative, expressed
Chr7:3806093…3812579	6486	+	LOC_Os07g07600.1	transposon protein, putative, unclassified, expressed
Chr7:3916786…3918348	1562		LOC_Os07g07820.1	expressed protein
Chr7:3929145…3946985	17840	+	LOC_Os07g07830.1	retrotransposon protein, putative, Ty3-gypsy subclass, expressed
		+	LOC_Os07g07840.1	retrotransposon protein, putative, Ty3-gypsy subclass, expressed
			LOC_Os07g07850.1	hypothetical protein
Chr7:10232883…10233452	569		intergenic
Chr7:12748490…12751718	3228		LOC_Os07g22640.1	lipid binding protein, putative, expressed
Chr7:15371465…15372958	1493		intergenic
Chr7:15411359…15413942	2583		intergenic
Chr7:16669815…16670335	520		LOC_Os07g28470.1	coiled-coil domain-containing protein 111, putative, expressed
Chr7:17655768…17666945	11177	+	LOC_Os07g29980.1	transposon protein, putative, CACTA, En/Spm sub-class, expressed
		+	LOC_Os07g29990.1	transposon protein, putative, CACTA, En/Spm sub-class, expressed
Chr7:18244342…18245115	773		LOC_Os07g30820.1	zinc finger family protein, putative, expressed
Chr7:18250353…18250840	487		intergenic
Chr7:18682196…18683366	1170		intergenic
Chr7:18683366…19179139	495773	+	LOC_Os07g32240.1	retrotransposon protein, putative, unclassified
		+	LOC_Os07g32250.1	retrotransposon protein, putative, unclassified, expressed
		+	LOC_Os07g32260.1	retrotransposon protein, putative, unclassified, expressed
		+	LOC_Os07g32270.1	retrotransposon protein, putative, unclassified
Chr7:19520047…19526327	6280	+	LOC_Os07g32690.1	retrotransposon protein, putative, unclassified, expressed
Chr7:19779045…19786951	7906		LOC_Os07g33120.1	expressed protein
		+	LOC_Os07g33130.1	retrotransposon protein, putative, unclassified, expressed
Chr7:20239829…20247681	7852	+	LOC_Os07g33820.1	transposon protein, putative, CACTA, En/Spm sub-class, expressed
		+	LOC_Os07g33830.1	retrotransposon protein, putative, unclassified, expressed
		+	LOC_Os07g33840.1	retrotransposon protein, putative, unclassified
Chr7:20713848…20718490	4642	+	LOC_Os07g34550.1	retrotransposon protein, putative, unclassified, expressed
Chr7:21993288…21997691	4403	+	LOC_Os07g36710.1	retrotransposon protein, putative, unclassified, expressed
Chr7:22007860…22010037	2177		LOC_Os07g36740.1	CSLF4 - cellulose synthase-like family F; beta1,3;1,4 glucan synthase, expressed
Chr7:22160127…22166570	6443	+	LOC_Os07g36990.1	retrotransposon protein, putative, Ty1-copia subclass, expressed
Chr7:22478363…22481853	3490		intergenic
Chr7:22520334…22523195	2861	+	LOC_Os07g37590.1	transposon protein, putative, unclassified, expressed
Chr7:23393190…23393666	476		LOC_Os07g39010.1	lactose permease-related, putative, expressed
Chr7:24361651…24369453	7802	+	LOC_Os07g40650.1	transposon protein, putative, unclassified, expressed
Chr7:24538061…24554574	16513		LOC_Os07g41014.1	glycosyl hydrolases family 17 protein, expressed
		+	LOC_Os07g41030.1	retrotransposon protein, putative, Ty3-gypsy subclass
Chr7:25329963…25331243	1280		LOC_Os07g42340.1	hypothetical protein
Chr7:25810121…25818299	8178	+	LOC_Os07g43080.1	retrotransposon protein, putative, unclassified
Chr7:27492740…27493450	710		intergenic
Chr7:27861213…27864555	3342		intergenic
Chr7:28542966…28546535	3569	+	LOC_Os07g47800.1	transposon protein, putative, unclassified, expressed
Chr7:29487915…29488835	920		intergenic
Chr8:334330…338685	4355	+	LOC_Os08g01570.1	retrotransposon protein, putative, unclassified, expressed
Chr8:385068…386270	1202		LOC_Os08g01660.1	mago nashi, putative, expressed
Chr8:1019672…1020101	429		intergenic
Chr8:1944419…1950826	6407	+	LOC_Os08g04020.1	retrotransposon protein, putative, Ty1-copia subclass, expressed
Chr8:2821434…2829921	8487	+	LOC_Os08g05360.1	transposon protein, putative, unclassified, expressed
Chr8:3397139…3404657	7518	+	LOC_Os08g06150.1	retrotransposon protein, putative, unclassified
		+	LOC_Os08g06160.1	retrotransposon protein, putative, unclassified
Chr8:4756306…4767721	11415	+	LOC_Os08g08300.1	transposon protein, putative, CACTA, En/Spm sub-class, expressed
		+	LOC_Os08g08310.1	transposon protein, putative, CACTA, En/Spm sub-class, expressed
Chr8:6291751…6292357	606		intergenic
Chr8:8183015…8188131	5116	+	LOC_Os08g13720.1	retrotransposon protein, putative, unclassified, expressed
Chr8:8210470…8212053	1583		intergenic
Chr8:8688478…8701347	12869	+	LOC_Os08g14470.1	transposon protein, putative, unclassified, expressed
		+	LOC_Os08g14480.1	transposon protein, putative, unclassified, expressed
Chr8:9219537…9220176	639		intergenic
Chr8:9357495…9375006	17511	+	LOC_Os08g15360.1	retrotransposon protein, putative, unclassified, expressed
		+	LOC_Os08g15370.1	retrotransposon protein, putative, unclassified, expressed
		+	LOC_Os08g15380.1	retrotransposon protein, putative, unclassified
			LOC_Os08g15390.1	hypothetical protein
		+	LOC_Os08g15400.1	retrotransposon protein, putative, unclassified, expressed
Chr8:9428383…9431304	2921		intergenic
Chr8:9996294…10079701	83407		intergenic
Chr8:10174343...10177796	3453		intergenic
Chr8:10686517…10690006	3489		intergenic
Chr8:11330134…11333281	3147	+	LOC_Os08g18990.1	retrotransposon protein, putative, unclassified, expressed
Chr8:11431248…11434928	3680	+	LOC_Os08g19120.1	retrotransposon protein, putative, Ty1-copia subclass, expressed
Chr8:12132247…12139944	7697	+	LOC_Os08g20220.1	retrotransposon protein, putative, unclassified, expressed
Chr8:13785415…13808590	23175		LOC_Os08g22930.1	conserved hypothetical protein
		+	LOC_Os08g22940.1	retrotransposon protein, putative, unclassified
		+	LOC_Os08g22950.1	retrotransposon protein, putative, unclassified
		+	LOC_Os08g22960.1	retrotransposon protein, putative, Ty3-gypsy subclass, expressed
Chr8:14048115…14051394	3279		LOC_Os08g23280.1	expressed protein
Chr8:14128372…14131797	3425		LOC_Os08g23370.1	hypothetical protein
Chr8:14472256…14475839	3583	+	LOC_Os08g23920.1	transposon protein, putative, unclassified
Chr8:14505151…14508399	3248		intergenic
Chr8:15081569…15082775	1206		intergenic
Chr8:15155356…15163101	7745	+	LOC_Os08g24990.1	retrotransposon protein, putative, Ty3-gypsy subclass, expressed
		+	LOC_Os08g25000.1	retrotransposon protein, putative, Ty3-gypsy subclass, expressed
Chr8:15181824…15183266	1442		intergenic
Chr8:17872989…17884547	11558	+	LOC_Os08g29180.1	transposon protein, putative, CACTA, En/Spm sub-class, expressed
Chr8:17912839…17913781	942		intergenic
Chr8:17919846…17922800	2954	+	LOC_Os08g29230.1	retrotransposon protein, putative, unclassified
Chr8:19839211…19840461	1250		intergenic
Chr8:20674236…20674665	429		intergenic
Chr8:20907593…20918873	11280	+	LOC_Os08g33500.1	transposon protein, putative, CACTA, En/Spm sub-class, expressed
		+	LOC_Os08g33510.1	transposon protein, putative, CACTA, En/Spm sub-class, expressed
Chr8:21060734…21063895	3161		LOC_Os08g33730.1	expressed protein
Chr8:26436078…26437510	1432		LOC_Os08g41870.1	hypothetical protein
Chr8:26808602…26809208	606		intergenic
Chr9:1171054…1171938	884		intergenic
Chr9:1297662…1298454	792		intergenic
Chr9:1440110…1443028	2918		LOC_Os09g03050.1	hypothetical protein
Chr9:1831289…1847363	16074	+	LOC_Os09g03650.1	transposon protein, putative, unclassified, expressed
		+	LOC_Os09g03660.1	retrotransposon protein, putative, unclassified, expressed
		+	LOC_Os09g03670.1	retrotransposon protein, putative, unclassified, expressed
Chr9:2433529…2450138	16609	+	LOC_Os09g04560.1	retrotransposon protein, putative, unclassified, expressed
		+	LOC_Os09g04570.1	retrotransposon protein, putative, unclassified
		+	LOC_Os09g04580.1	retrotransposon protein, putative, unclassified
		+	LOC_Os09g04590.1	retrotransposon protein, putative, unclassified, expressed
Chr9:2531992…2532898	906		intergenic
Chr9:2650425…2661541	11116	+	LOC_Os09g04940.1	retrotransposon protein, putative, unclassified, expressed
		+	LOC_Os09g04950.1	retrotransposon protein, putative, unclassified, expressed
Chr9:3008119…3012662	4543	+	LOC_Os09g06390.1	retrotransposon protein, putative, unclassified, expressed
Chr9:3092861…3105113	12252		LOC_Os09g06520.1	expressed protein
			LOC_Os09g06530.1	expressed protein
Chr9:4619292…4623638	4346		LOC_Os09g08760.1	hypothetical protein
Chr9:4711422…4723429	12007	+	LOC_Os09g08900.1	retrotransposon protein, putative, Ty3-gypsy subclass, expressed
Chr9:5072294…5082354	10060	+	LOC_Os09g09430.1	retrotransposon protein, putative, unclassified
Chr9:6909136…6909769	633		intergenic
Chr9:6913767…6916729	2962		intergenic
Chr9:7815390…7818630	3240		intergenic
Chr9:10010499…10011929	1430		LOC_Os09g16380.1	pleiotropic drug resistance protein, putative, expressed
Chr9:13740486…13742171	1685		LOC_Os09g23180.1	expressed protein
Chr9:14067721…14071875	4154	+	LOC_Os09g23670.1	transposon protein, putative, unclassified, expressed
Chr9:15173773…15180895	7122		intergenic
Chr9:16796826…16802927	6101	+	LOC_Os09g27640.1	retrotransposon protein, putative, unclassified
Chr9:17147440…17149111	1671		intergenic
Chr9:17197891…17203659	5768	+	LOC_Os09g28330.1	transposon protein, putative, unclassified, expressed
Chr9:19340603…19348427	7824	+	LOC_Os09g32390.1	transposon protein, putative, unclassified, expressed
Chr9:20432758…20434180	1422		intergenic
Chr10:660729…664384	3655		LOC_Os10g02050.1	expressed protein
Chr10:727553…728363	810		intergenic
Chr10:850970…851659	689		intergenic
Chr10:1050569…1056302	5733		LOC_Os10g02680.1	EF hand family protein, putative, expressed
			LOC_Os10g02690.1	expressed protein
Chr10:1140054…1140823	769		LOC_Os10g02840.1	O-methyltransferase, putative, expressed
Chr10:2811645…15252949	12441304
Chr10:2892242…2892941	699		intergenic
Chr10:3694422…3695533	1111		intergenic
Chr10:4268089…4271260	3171		intergenic
Chr10:4320420…4320850	430		intergenic
Chr10:4351057…4358491	7434	+	LOC_Os10g08030.1	retrotransposon protein, putative, Ty3-gypsy subclass
		+	LOC_Os10g08040.1	retrotransposon protein, putative, Ty3-gypsy subclass, expressed
Chr10:4442190…4443508	1318		LOC_Os10g08220.1	expressed protein
Chr10:4455851…4466314	10463	+	LOC_Os10g08250.1	transposon protein, putative, CACTA, En/Spm sub-class, expressed
		+	LOC_Os10g08260.1	transposon protein, putative, CACTA, En/Spm sub-class, expressed
Chr10:5190057…5196337	6280	+	LOC_Os10g09610.1	retrotransposon protein, putative, unclassified, expressed
Chr10:5282296…5283221	925		intergenic
Chr10:5348138…5355966	7828	+	LOC_Os10g09880.1	retrotransposon protein, putative, unclassified
Chr10:5360307…5365256	4949		LOC_Os10g09890.1	hypothetical protein
		+	LOC_Os10g09900.1	transposon protein, putative, unclassified, expressed
Chr10:5464632…5465829	1197		LOC_Os10g10040.1	cytochrome P450, putative, expressed
Chr10:6034423…6050868	16445	+	LOC_Os10g10920.1	retrotransposon protein, putative, Ty3-gypsy subclass
		+	LOC_Os10g10904.1	retrotransposon protein, putative, Ty3-gypsy subclass
		+	LOC_Os10g10938.1	transposon protein, putative, unclassified
Chr10:6391665…6402922	11257		LOC_Os10g11550.1	expressed protein
		+	LOC_Os10g11560.1	retrotransposon protein, putative, unclassified
			LOC_Os10g11570.1	expressed protein
Chr10:7600466…7611762	11296	+	LOC_Os10g13980.1	retrotransposon protein, putative, Ty3-gypsy subclass, expressed
		+	LOC_Os10g13990.1	retrotransposon protein, putative, Ty3-gypsy subclass, expressed
Chr10:8970071…8973475	3404		intergenic
Chr10:13260853…13263255	2402		LOC_Os10g25580.1	hypothetical protein
Chr10:15769546…15772543	2997	+	LOC_Os10g30350.1	retrotransposon protein, putative, unclassified, expressed
Chr10:16381260…16381567	307		intergenic
Chr10:16938590…16940759	2169		LOC_Os10g32270.1	expressed protein
Chr10:18892864…18896383	3519	+	LOC_Os10g35350.1	transposon protein, putative, unclassified, expressed
Chr10:18946096…18951282	5186		intergenic
Chr10:19008272…19008758	486		intergenic
Chr10:20049570…20055978	6408		LOC_Os10g37459.1	hypothetical protein
		+	LOC_Os10g37468.1	retrotransposon protein, putative, Ty1-copia subclass, expressed
Chr10:20313483…20314635	1152		intergenic
Chr10:20863489…20864497	1008		LOC_Os10g39130.1	OsMADS56 - MADS-box family gene with MIKCc type-box, expressed
Chr11:3646801…3647421	620		intergenic
Chr11:5034650…5040707	6057	+	LOC_Os11g09390.1	retrotransposon protein, putative, Ty3-gypsy subclass, expressed
Chr11:5184286…5188480	4194	+	LOC_Os11g09720.1	transposon protein, putative, CACTA, En/Spm sub-class, expressed
Chr11:6498920…6502260	3340	+	LOC_Os11g11694.1	retrotransposon protein, putative, unclassified, expressed
Chr11:6659930…6661766	1836		LOC_Os11g11990.1	NB-ARC domain containing protein, expressed
Chr11:11436714…11441880	5166	+	LOC_Os11g19864.1	transposon protein, putative, Pong sub-class, expressed
Chr11:23553482…23555667	2185		LOC_Os11g39540.1	14-3-3 protein, putative, expressed
Chr11:23620126…23620715	589		intergenic
Chr11:23746117…23747711	1594		intergenic
Chr11:24684972…24700542	15570		LOC_Os11g41180.1	expressed protein
		+	LOC_Os11g41190.1	retrotransposon protein, putative, unclassified, expressed
Chr11:24788436…24788923	487		intergenic
Chr11:24954658…24958562	3904		intergenic
Chr11:25225732…25226518	786		LOC_Os11g41940.1	expressed protein
Chr11:25444533…25461103	16570	+	LOC_Os11g42250.1	retrotransposon protein, putative, Ty3-gypsy subclass, expressed
		+	LOC_Os11g42260.1	retrotransposon protein, putative, Ty3-gypsy subclass, expressed
Chr11:26349920…26356617	6697	+	LOC_Os11g43660.1	transposon protein, putative, unclassified, expressed
Chr11:26586864…26598788	11924	+	LOC_Os11g44014.1	retrotransposon protein, putative, unclassified, expressed
Chr11:26981354…26982652	1298		intergenic
Chr11:27081052…27088140	7088	+	LOC_Os11g44750.1	retrotransposon protein, putative, unclassified, expressed
Chr11:27170438…27174308	3870		intergenic
Chr11:27226700…27229750	3050		intergenic
Chr11:27611141…27626045	14904	+	LOC_Os11g45650.1	transposon protein, putative, CACTA, En/Spm sub-class, expressed
		+	LOC_Os11g45660.1	transposon protein, putative, CACTA, En/Spm sub-class, expressed
		+	LOC_Os11g45670.1	transposon protein, putative, CACTA, En/Spm sub-class, expressed
Chr11:27901033…27907374	6341	+	LOC_Os11g46090.1	r\etrotransposon protein, putative, Ty1-copia subclass, expressed
Chr11:27921553…27928364	6811		intergenic
Chr11:28858016…28861990	3974	+	LOC_Os11g47850.1	transposon protein, putative, unclassified, expressed
Chr12:4047651…4051162	3511		intergenic
Chr12:6550421…6556591	6170	+	LOC_Os12g11970.1	retrotransposon protein, putative, Ty1-copia subclass, expressed
Chr12:6626389…6627839	1450		intergenic
Chr12:6681172…6687609	6437	+	LOC_Os12g12180.1	retrotransposon protein, putative, Ty1-copia subclass, expressed
Chr12:6898242…6907691	9449	+	LOC_Os12g12530.1	retrotransposon protein, putative, unclassified
		+	LOC_Os12g12540.1	retrotransposon protein, putative, unclassified
Chr12:6996693…7009612	12919	+	LOC_Os12g12700.1	retrotransposon protein, putative, unclassified, expressed
		+	LOC_Os12g12710.1	transposon protein, putative, unclassified, expressed
Chr12:7345632…7356206	10574	+	LOC_Os12g13180.1	transposon protein, putative, CACTA, En/Spm sub-class, expressed
		+	LOC_Os12g13190.1	retrotransposon protein, putative, unclassified, expressed
		+	LOC_Os12g13200.1	transposon protein, putative, CACTA, En/Spm sub-class, expressed
Chr12:7904282…7915442	11160	+	LOC_Os12g13920.1	transposon protein, putative, CACTA, En/Spm sub-class, expressed
Chr12:7947217…7978133	30916	+	LOC_Os12g13990.1	retrotransposon protein, putative, Ty3-gypsy subclass, expressed
		+	LOC_Os12g14000.1	retrotransposon protein, putative, Ty3-gypsy subclass, expressed
		+	LOC_Os12g14010.1	retrotransposon protein, putative, unclassified
		+	LOC_Os12g14020.1	retrotransposon protein, putative, Ty3-gypsy subclass, expressed
			LOC_Os12g14030.1	hypothetical protein
		+	LOC_Os12g14040.1	retrotransposon protein, putative, Ty3-gypsy subclass
		+	LOC_Os12g14050.1	retrotransposon protein, putative, Ty3-gypsy subclass, expressed
Chr12:8657936…8660156	2220		intergenic
Chr12:8660906…8725209	64303		LOC_Os12g15190.1	conserved hypothetical protein
			LOC_Os12g15222.1	expressed protein
			LOC_Os12g15240.1	expressed protein
			LOC_Os12g15250.1	expressed protein
			LOC_Os12g15270.1	expressed protein
		+	LOC_Os12g15280.1	retrotransposon protein, putative, Ty1-copia subclass
		+	LOC_Os12g15290.1	retrotransposon protein, putative, Ty1-copia subclass
		+	LOC_Os12g15300.1	retrotransposon protein, putative, Ty1-copia subclass
Chr12:9845580...9856885	11305	+	LOC_Os12g17210.1	retrotransposon protein, putative, Ty3-gypsy subclass, expressed
		+	LOC_Os12g17220.1	retrotransposon protein, putative, Ty3-gypsy subclass, expressed
Chr12:10124956…10126653	1697		LOC_Os12g17680.1	expressed protein
Chr12:10754298…10755238	940	+	LOC_Os12g18620.1	retrotransposon protein, putative, Ty1-copia subclass
Chr12:11087191…11090185	2994		intergenic
Chr12:11875655…11882556	6901	+	LOC_Os12g20340.1	retrotransposon protein, putative, Ty3-gypsy subclass, expressed
		+	LOC_Os12g20350.1	retrotransposon protein, putative, unclassified, expressed
Chr12:12107674…12112079	4405	+	LOC_Os12g21530.1	retrotransposon, putative, centromere-specific
		+	LOC_Os12g21540.1	retrotransposon protein, putative, unclassified, expressed
Chr12:12331522…12336256	4734	+	LOC_Os12g21900.1	retrotransposon protein, putative, unclassified, expressed
Chr12:12571434…12572709	1275		LOC_Os12g22284.1	white-brown complex homolog protein 11, putative, expressed
Chr12:13176069…13177312	1243		intergenic
Chr12:13239437…13248740	9303		LOC_Os12g23400.1	expressed protein
		+	LOC_Os12g23430.1	transposon protein, putative, Ac/Ds sub-class, expressed
Chr12:20760625…20762301	1676		intergenic
Chr12:20957966…20964345	6379	+	LOC_Os12g34580.1	retrotransposon protein, putative, Ty1-copia subclass, expressed
Chr12:24789638…24793133	3495		intergenic
Chr12:25014669…25015613	944		LOC_Os12g40419.1	protein kinase domain containing protein, expressed
Chr12:25139051…25140232	1181		LOC_Os12g40619.1	expressed protein
Chr12:26961926…26966664	4738	+	LOC_Os12g43460.1	transposon protein, putative, unclassified, expressed
Chr12:27225624…27229865	4241		intergenic
